# Supplementary material
Source: publisher site journal article supplement (https://study.sagepub.com/sites/default/files/Appendix%20G_Validity_Control_and%20Causal%20Inferences%20Checklist_1.doc)
Supplement: Supplementary file 1 [file Appendix%20G_Validity_Control_and%20Causal%20Inferences%20Checklist_1.doc]

| **Validity, Control, and Causal Inferences** | | |
| --- | --- | --- |
|  | **Level** | **Explanation** |
| **Internal Validity** - Threat is (high ↑) (medium ↔) (low ↓) | | |
| History |  |  |
| Maturation |  |  |
| Testing |  |  |
| Instrumentation |  |  |
| Statistical Regression |  |  |
| Attrition |  |  |
| Selection Bias |  |  |
| Combination of Selection and other Treatments |  |  |
| Diffusion |  |  |
| Special Treatment |  |  |
| Sequencing Effects |  |  |
| **Statistical Conclusion Validity -** Threat is (high ↑) (medium ↔) (low ↓) | | |
| Low Statistical Power |  |  |
| Assumption Violation of Statistical Tests |  |  |
| Error Rate Problem |  |  |
| Restriction of Range |  |  |
| Extraneous Variance in the Experimental Setting |  |  |
| Inaccurate Effect Size Estimation |  |  |
| Variability in Procedures |  |  |
| Subject Heterogeneity |  |  |
| Unreliability of the Measures |  |  |
| Multiple Comparisons and Error Rates |  |  |
| **Control -** Design and Statistical Control is (strong ϮϮϮ) (medium ϮϮ) (weak Ϯ) | | |
| Manipulation |  |  |
| Elimination |  |  |
| Inclusion |  |  |
| Group or Condition Assignment |  |  |
| Statistical Procedures |  |  |
| **Cause and Effect -** Cause-Effect determination is (strong ϮϮϮ) (medium ϮϮ) (weak Ϯ) | | |
| Covariation |  |  |
| Temporal Precedence |  |  |
| No Plausible Alternative Explanations |  |  |
